# Supplementary material
Source: PubMed Central journal article supplement (PMC7914002)
Supplement: NIHMS1639052-supplement-supporting_info.pdf [file NIHMS1639052-supplement-supporting_info.pdf]

## SUPPORTING INFORMATION

### **A phosphorylated intermediate in the activation of WNK kinases**

Radha Akella<sup>†</sup>, Mateusz A. Drozd<sup>†</sup>, John M. Humphreys<sup>†</sup>, Jenny Jiou<sup>†</sup>, Mateusz Z. Durbacz<sup>‡</sup>, Zuhair J. Mohammed<sup>◇</sup>, Haixia He<sup>†</sup>, Joanna Liwocha<sup>§</sup>, Kamil Sekulski<sup>†</sup>, Elizabeth J. Goldsmith<sup>†\*</sup>

<sup>†</sup> Department of Biophysics, The University of Texas Southwestern Medical Center, 5323 Harry Hines Blvd, Dallas, TX 75390-8816, USA

<sup>‡</sup> Faculty of Agronomy and Bioengineering, University of Life Sciences, Wojska Polskiego 28, 60-624 Poznan, Poland

<sup>◇</sup> Biomedical Engineering, University of Texas at Dallas, Richardson, TX 75080

<sup>§</sup> Department of Molecular Machines and Signaling, Max Planck Institute for Biochemistry, Am Klopferspitz 18, D-82152 Martinsried, Germany

#### **Corresponding author**

\*Elizabeth J. Goldsmith: [elizabeth.goldsmith@utsouthwestern.edu](mailto:elizabeth.goldsmith@utsouthwestern.edu); Tel. (214) 645-6376

**Table S1.** Statistics of crystallographic data and refinement

|                                                                | <b>5W7T (pWNK1)</b>                | <b>pWNK1+Sucrose</b>                    |
|----------------------------------------------------------------|------------------------------------|-----------------------------------------|
| Space group                                                    | P1 21 2                            | C 1 2 1                                 |
| Unit cell dimensions (Å)                                       | <i>a,b,c</i> =45.18, 62.24,120.90  | <i>a,b,c</i> =129.83,64.6,45.87         |
| Angles (°)                                                     | $\alpha,\beta,\gamma$ =90, 92.3,90 | $\alpha,\beta,\gamma$ = 90.0,108.4,90.0 |
| Wavelength (Å)                                                 | 0.97112                            | 0.92025                                 |
| Resolution (Å)                                                 | 30-2.0 (2.0-2.05)                  | 30.0-2.18 (2.23-2.17)                   |
| Unique reflections (last shell)                                | 39436(1844)                        | 16989 (996)                             |
| Completeness (%) (last shell)                                  | 91 (58)                            | 94 (76)                                 |
| I/ $\sigma$ (last shell)                                       | 12.7 (1.8)                         | 10.8 (1.5)                              |
| R <sub>sym</sub> , R <sub>pim</sub> (last shell) <sup>a</sup>  | 0.11, 0.06 (0.72, 0.45)            | 0.08, 0.04, (0.25, 0.12)                |
| Redundancy (last shell)                                        | 3.9 (3.3)                          | 5.5 (5.0)                               |
| CC1/2 (last shell)                                             | 0.8(0.53)                          | 1.0 (0.96)                              |
| Wilson B factor                                                | 18.5                               | 35.0                                    |
| <b>Structure</b>                                               |                                    |                                         |
| R <sub>work</sub> /R <sub>free</sub> <sup>b</sup> (last shell) | 0.151/0.226 (0.20/0.21)            | 0.19/0.24(0.21/0.27)                    |
| Non-H protein atoms                                            | 5355                               | 2405                                    |
| Waters                                                         | 825                                | 220                                     |
| RMSD in bond length (Å) <sup>c</sup>                           | 0.013                              | 0.015                                   |
| RMSD in bond angles(°) <sup>c</sup>                            | 1.7                                | 2.0                                     |
| Average B-values (Å <sup>2</sup> )                             | 22                                 | 40                                      |
| Ramachandran plot stats. (%)                                   |                                    |                                         |
| Most favored region                                            | 98.0                               | 96                                      |
| Disallowed region                                              | 0.18                               | 0.8                                     |
| Molprobit Score                                                | 1.3                                | 2.3                                     |
| Residues missing from the model                                | None                               | A280-I285, 291-293                      |

$$^a R_{\text{sym}} = \sum |I_{\text{avg}} - I_j| / \sum I_j.$$

<sup>b</sup>  $R_{\text{factor}} = \sum |F_o - F_c| / \sum F_o$ , where  $F_o$  and  $F_c$  are observed and calculated structure factors, respectively,  $R_{\text{free}}$  was calculated from a randomly chosen 5% of reflections excluded from the refinement, and  $R_{\text{factor}}$  was calculated from the remaining 95% of reflections.

<sup>c</sup> r.m.s.d is the root-mean-square deviation from ideal geometry.

**Table S2** Comparison of Cavities and water content in uWNK1, pWNK1 and sucrose soaked pWNK1 structures

| Property                          | 6CN9 (uWNK1)<br>(dimeric) | 5W7T (pWNK)<br>(per monomer) | Suc-pWNK1<br>(monomer) |
|-----------------------------------|---------------------------|------------------------------|------------------------|
| Cavities (Top 10 Å <sup>3</sup> ) | 1900                      | 771                          | 977                    |
| Cavities (Top Å <sup>3</sup> )    | 650                       | 440                          | 346                    |

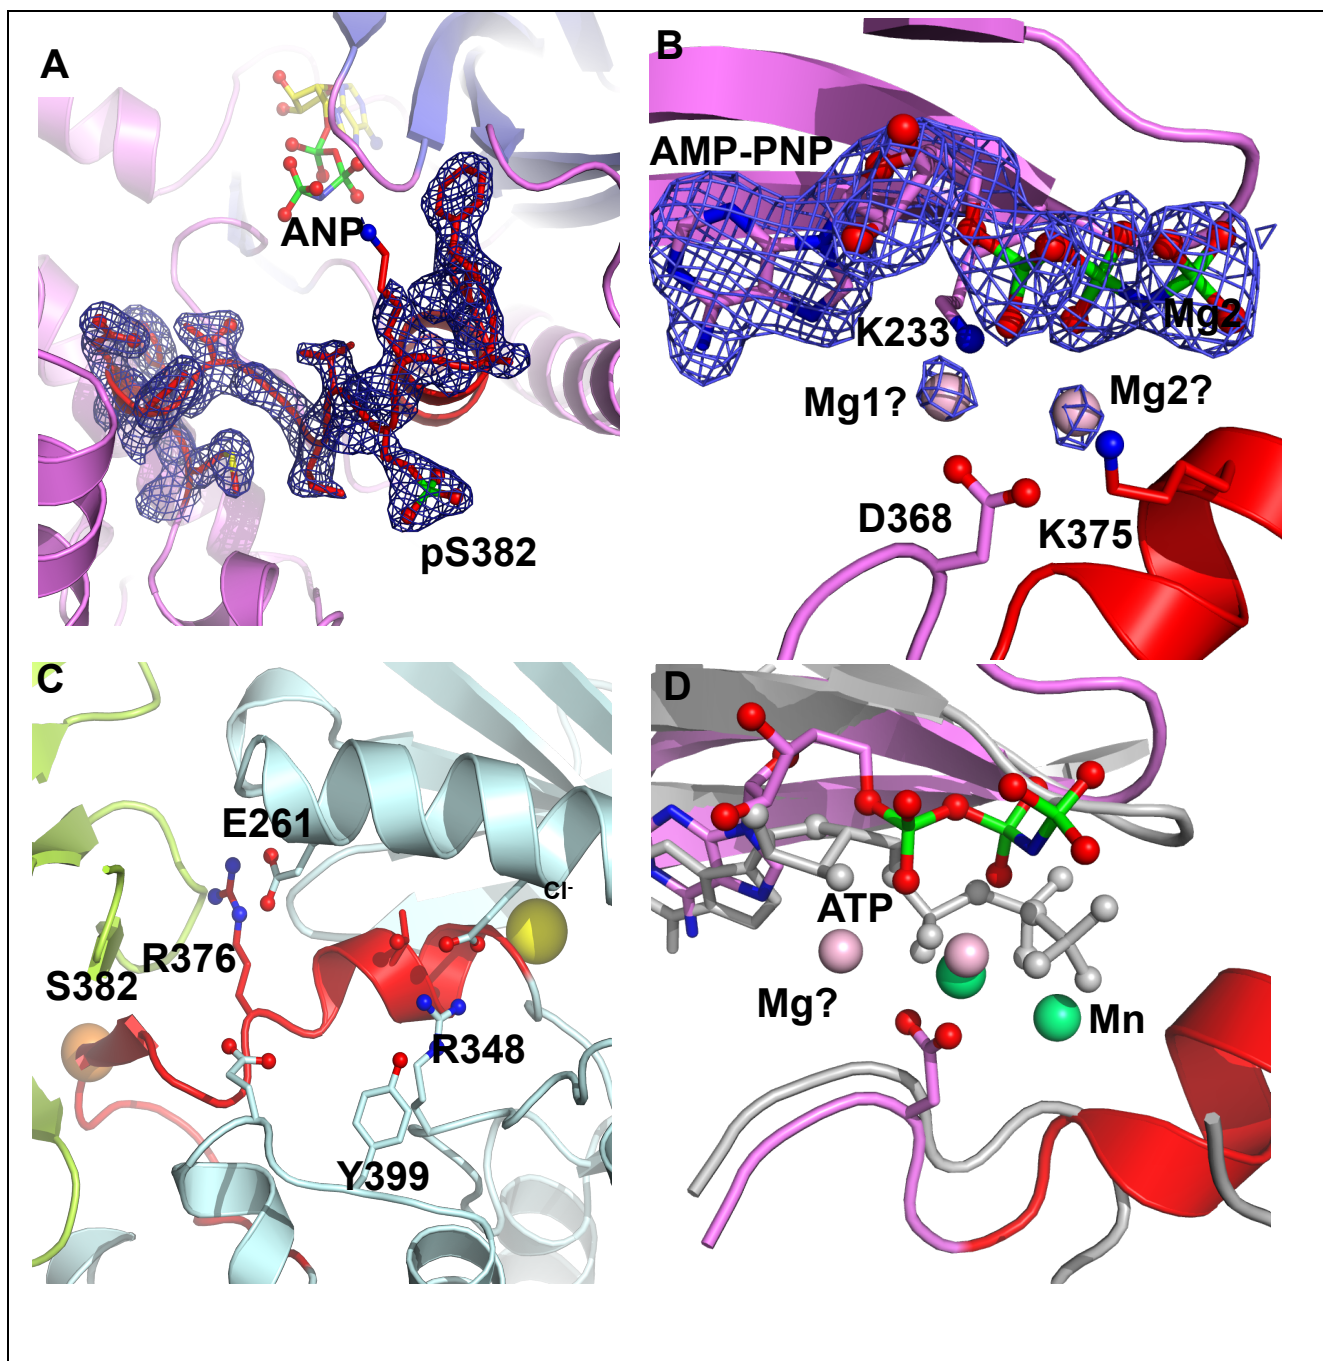

**Figure S1.** Electron density for pS382 in pWNK1 and comparison to uWNK1 and PKA. (A) Electron density for pS382 and flanking activation loop contoured at  $1\sigma$  in Coot. pWNK1 is magenta, AMP-PNP is shown in sticks. Putative Mg<sup>++</sup> ions positions in pWNK1. Electron density contoured at  $1\sigma$  on AMP-PNP and Mg<sup>++</sup> ions is blue. (C) The hAL in inactive dimeric uWNK1 (PDB file 6cn9, subunit A cyan, subunit B green). Activation loop red, chloride yellow,  $\alpha$  for S382 is shown as an orange sphere, showing its location in the subunit interface. (D) Superposition of the active site of pWNK1 compared with active PKA (PDB 1ATP) showing putative Mg<sup>++</sup> ions in pWNK1 (pink) and Mn<sup>++</sup> ions in PKA (cyan), pWNK1 is magenta. PKA is shown in gray.

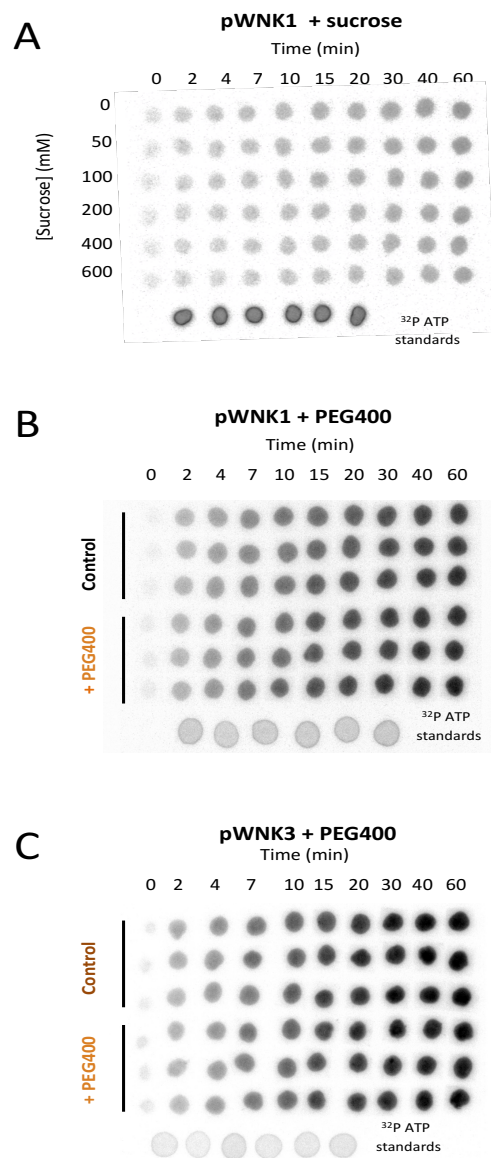

**Figure S2.** WNK assay autoradiography. Autoradiography for progress curves following total protein incorporation of  $^{32}\text{P}$  over time for (A) pWnk1 with increasing sucrose (B) pWnk1 with and without 15%PEG400 in triplicate, and (C) pWnk3 with and without 15%PEG400 in triplicate.

**A****TAO2 + PEG400**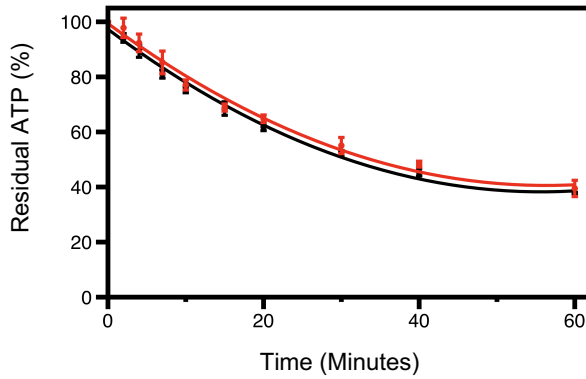**B****MEK6/DD + PEG400**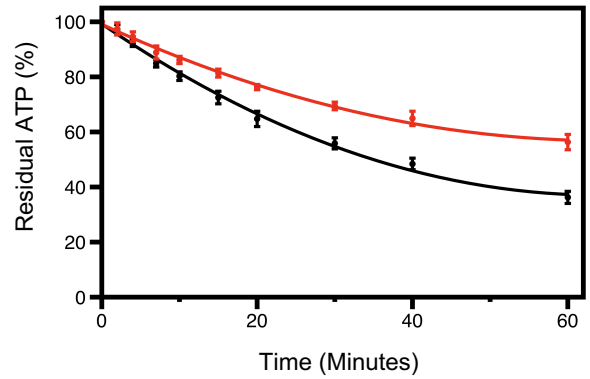

**Figure S3.** PEG400 effects on control kinases. (A) Progress curves for the activity of TAO2 on Myelin Basic Protein with (red) and without (black) 15%PEG400, tracking the disappearance of ATP using Kinase-Glo<sup>®</sup>. (B) Progress curves for the activity of MEK6/DD on kinase-dead p38a K53M with (red) and without (black) 15%PEG400, also using Kinase-Glo<sup>®</sup> as in (B).

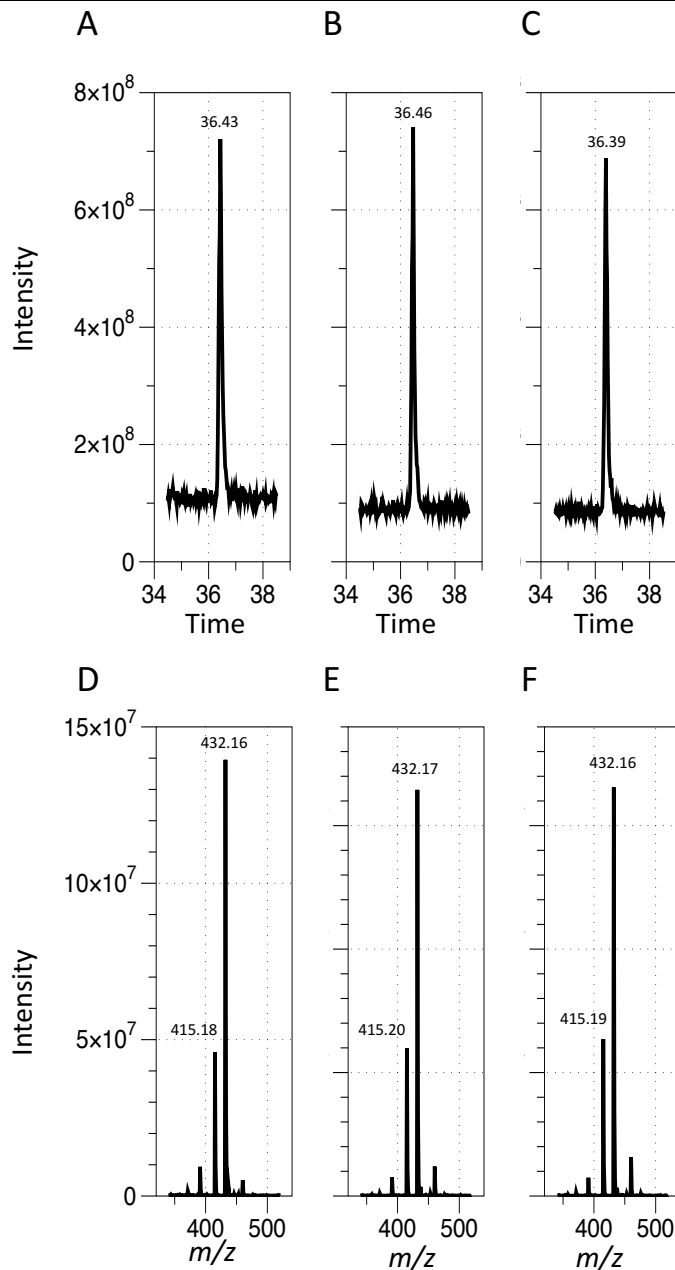

**Figure S4** Mass Spectrometry of PEG400. (A – C) TIC (Total Ion Current) traces showing the reverse phase HPLC elution time of the most prevalent ethylene glycol oligomer (PEG) (n=9). Negative control assays lacking ATP (A) or pWNK1 (B) are essentially identical to a full pWNK1 assay (C). Six other ethylene glycol oligomers were observed (n=7,8,10-13) which also showed no elution time change (data not shown). (D-E) Observed  $m/z$  of HPLC-separated PEG400 n=9 from traces observed in (A-C), respectively. Parental mass [M + H] of oligomer is 415.19, and an accompanying ammonium adduct has an  $m/z$  of 432.16.
